# Supplementary material for: Geology and vegetation control landsliding on forest-managed slopes in scarplands
Source: Copernicus journal article supplement (doi:10.5194/esurf-2022-46), 2022-08-15
Supplement: Supplementary file 1 [file esurf-2022-46-supplement.pdf]

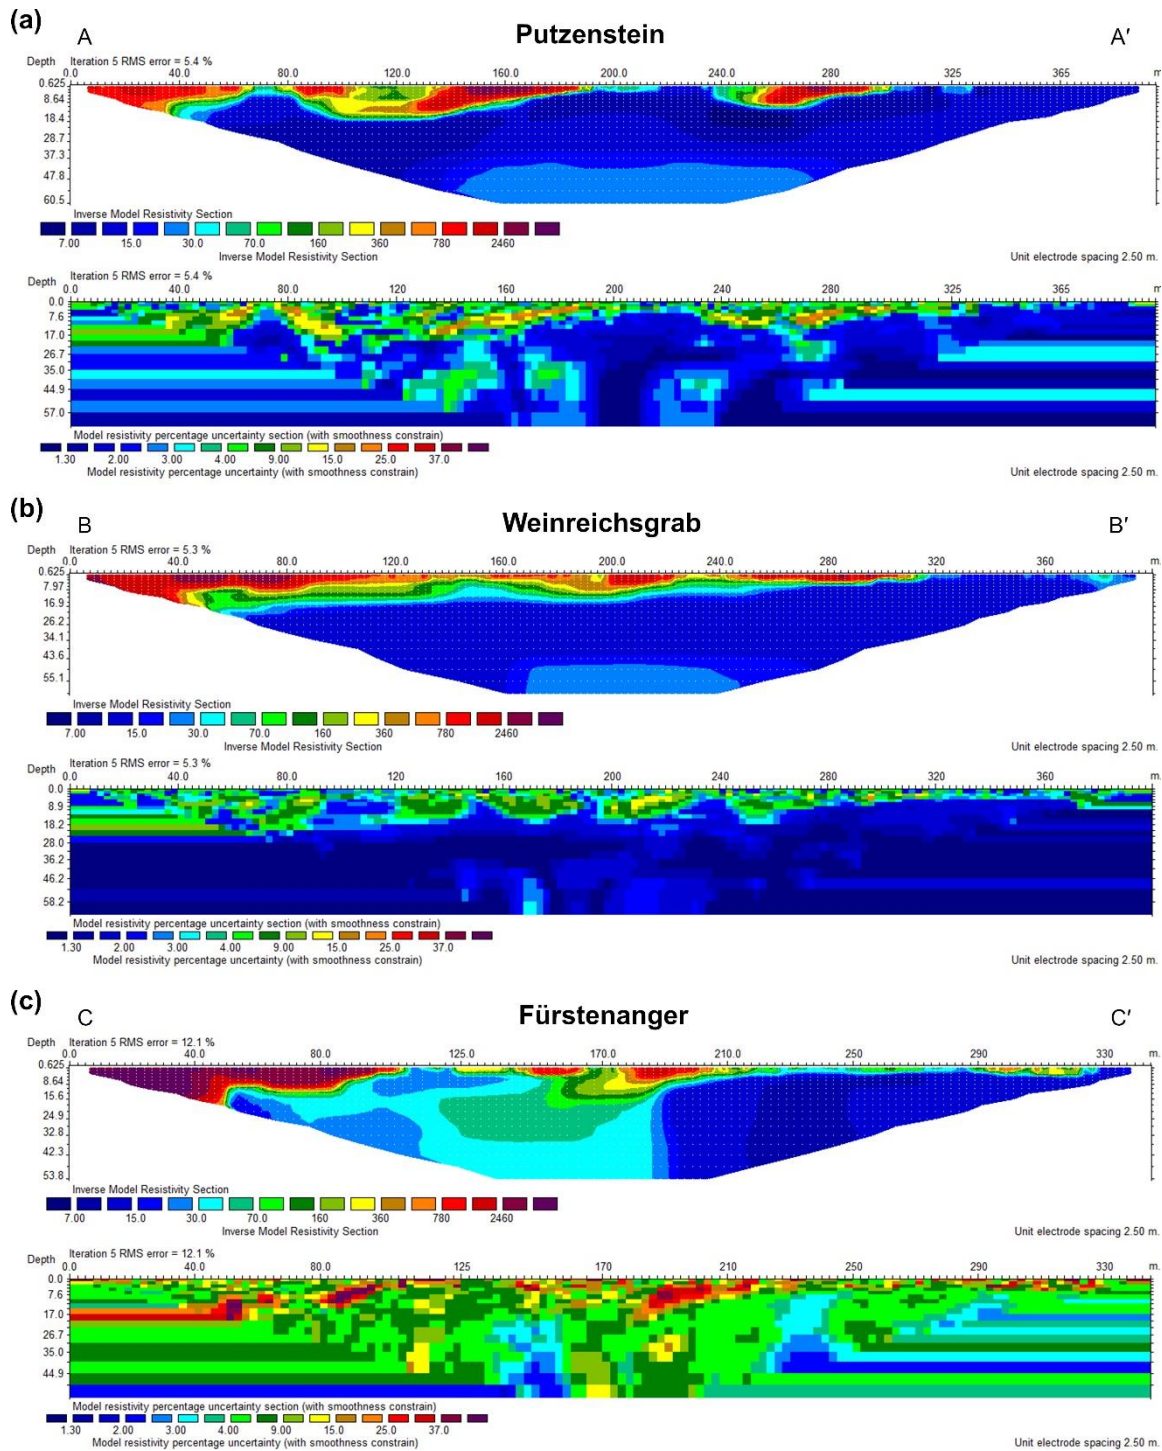

**Figure S1: Model uncertainty of geoelectric models at (a) Putzenstein, (b) Weinreichsgrab and (c) Fürstenanger.**

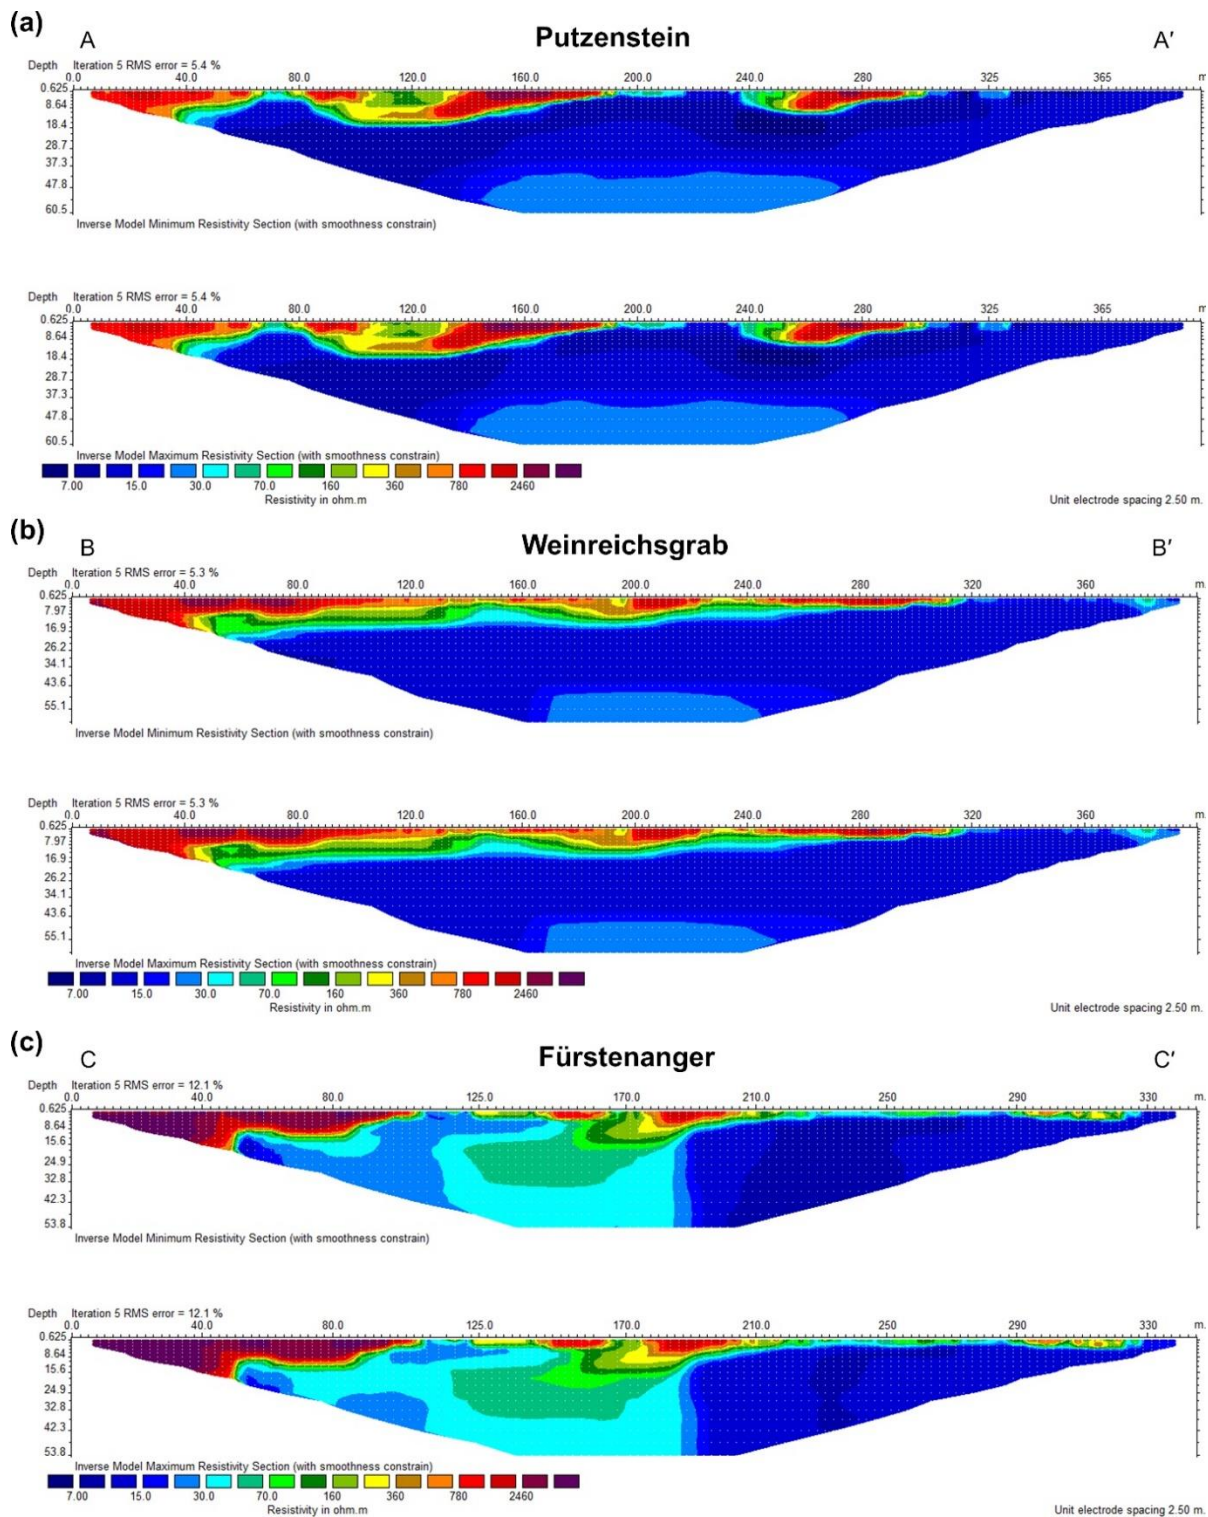

**Figure S2: Inverse model minimum and maximum resistivity of geoelectric models at (a) Putzenstein, (b) Weinreichsgrab and (c) Fürstenanger.**

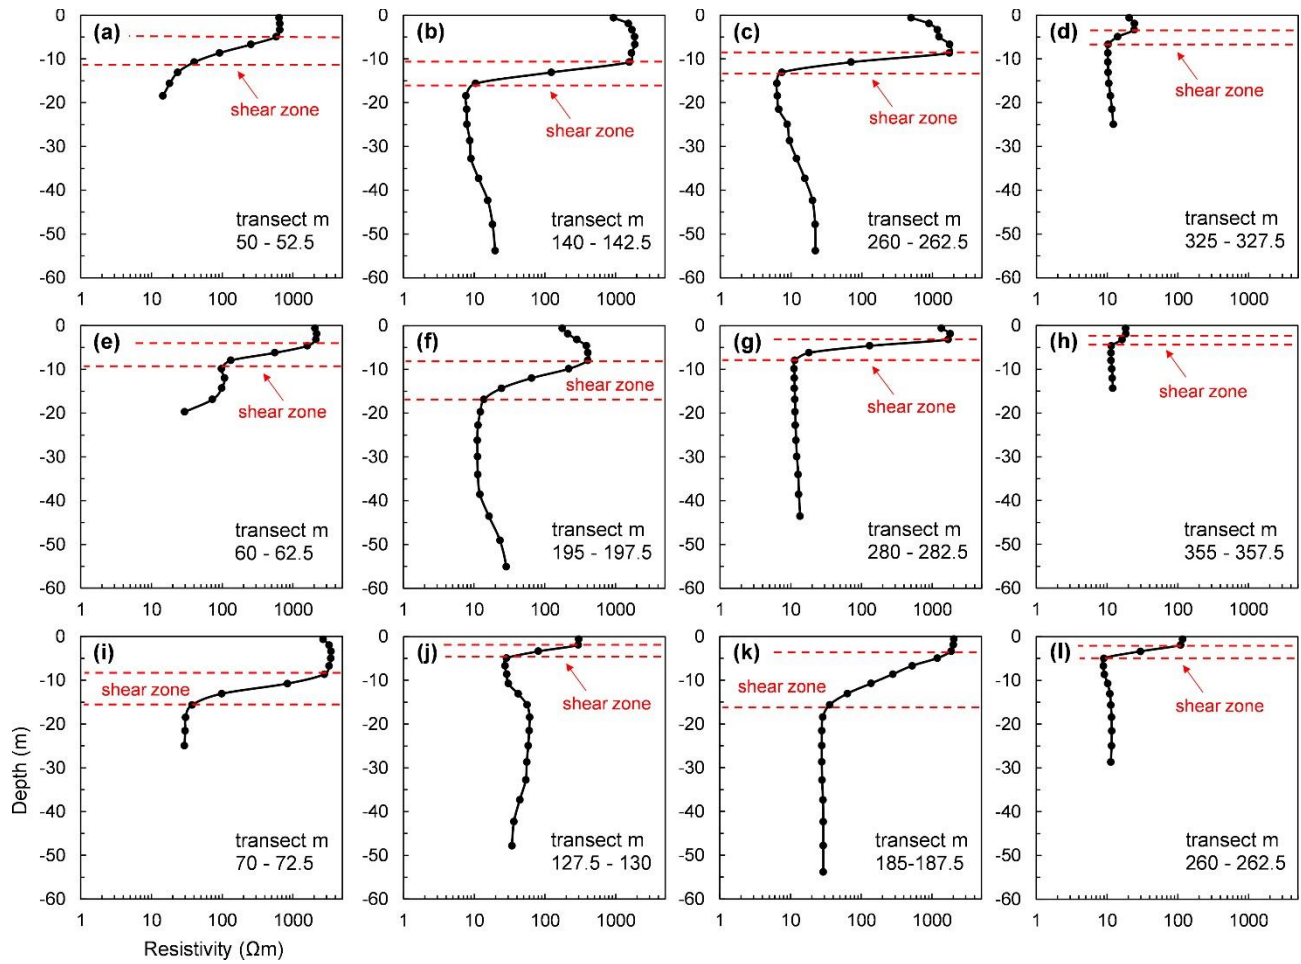

Figure S3: 1D virtual boreholes of geoelectric models at (a) Putzenstein, (b) Weinreichsgrab and (c) Fürstenanger.
